# Supplementary material for: Neodymium as Metal Cofactor for Biological Methanol Oxidation: Structure and Kinetics of an XoxF1-Type Methanol Dehydrogenase
Source: PubMed Central journal article supplement (PMC8546591; doi:10.1128/mbio.01708-21), 2021-09-21
Supplement: mbio.01708-21-sf002.pdf [file mbio.01708-21-sf002.pdf]

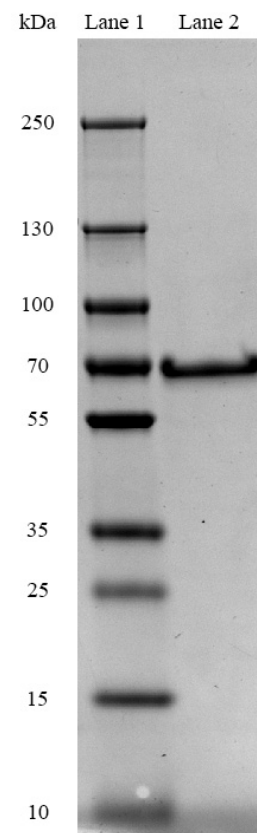

**Figure S2:** SDS-polyacrylamide gel showing the purification of Nd-XoxF1 from *Methylacidimicrobium thermophilum* AP8. Lane 1: 3  $\mu$ L PageRuler Plus Prestained Protein Ladder protein ladder of different masses in kDa. Lane 2: 2  $\mu$ g purified Nd-XoxF1 stained with Coomassie Brilliant Blue.
