# Supplementary material for: Neodymium as Metal Cofactor for Biological Methanol Oxidation: Structure and Kinetics of an XoxF1-Type Methanol Dehydrogenase
Source: PubMed Central journal article supplement (PMC8546591; doi:10.1128/mbio.01708-21), 2021-09-21
Supplement: mbio.01708-21-sf003.pdf [file mbio.01708-21-sf003.pdf]

**Figure S3:** Multiple sequence alignment of various methanol and alcohol dehydrogenases.

```
#1_ACS42169_Methylobacterium_extorquens_AM1_MxaF-type
#2_WP_012589514.1_Methylocella_silvestris_mxaFJGIRSACKLDEH_MxaF-type
#3_xoxF_2_Methylocella_sp._KOX_MxaF-type
#39_Hyphomicrobium_VS_HYPHVSv1_1280001_MxaF-type
#4_WP_036262132.1_Methylocapsa_aurea_XoxF5-type
#5_WP_091681465.1_Methylocapsa_palsarum_XoxF5-type
#6_WP_026607385.1_Methylocapsa_acidiphila_XoxF5-type
#7_WP_012590606.1_Methylocella_silvestris_xoxFGJ_XoxF5-type
#8_ACS40517_Methylobacterium_extorquens_AM1_XoxF5-type
#9_WP_003597620.1|Methylobacterium_extorquens_XoxF5-type
#10_WP_011746370.1|Paracoccus_denitrificans_XoxF5-type
#11_xoxF_4_Methylocella_sp._KOX_XoxF5-type
#12_WP_041367950.1_Methylocella_silvestris_XoxF5-type
#34_WP_092868386.1_xoxF_Hyphomicrobium_facile_XoxF5-type
#33_WP_013215583.1_xoxF_Hyphomicrobium_denitrificans_XoxF5-type
#38_WP_092037086.1_Methylobacterium_pseudosasicola_XoxF5-type
#37_WP_091863466.1_Methylobacterium_brachiatum_XoxF5-type
#17a_AAU90462.1_Methylococcus_capsulatus_str._Bath_XoxF5-type
#13_D14_FHGOONML_01469_Uncultured_Methylococcales_XoxF5_type
#14_E33_NFPLPOKJ_01232_Uncultured_Methylococcales_XoxF5_type
#42_YP_004038451.1_Methylorvorus_sp._MP688_XoxF4-type
#40_YP_003674616.1_Methylotenera_versatilis_301_XoxF4-type
#41_YP_546422.1_Methylobacillus_flagellatus_KT_XoxF4-type
#19_xoxF_1_Methylocella_sp._KOX_XoxF1-type
#17_WP_012251923.1_Methylobacterium_extorquens_XoxF3-type
#18_WP_012592359.1_Methylocella_silvestris_xoxFJG_XoxF3-type
#29_Methylacidimicrobium_fagopyrum_3C_NZ_KB901876_XoxF2-type
#31_Methylacidimicrobium_tartarophylax_4ac_XoxF2-type
#30_Methylacidimicrobium_cyclopophantes_3B_XoxF2-type
#32_NZ_JAFS01000001_Methylacidimicrobium_strain_LP2A_XoxF2-type
#20_Methylacidimicrobium_thermophilum_AP8_MTHMO_v1_1756)_XoxF2-type
#WP_134390782.1_Methylacidiphilum_sp._Yel_XoxF2-type
#TFE68643.1_Methylacidiphilum_sp._Phi_XoxF2-type
#WP_134440131.1_Methylacidiphilum_sp._Phi_XoxF2-type
#MPANT_v1_10387_Methylacidithermus_pantelleria_PQ17_XoxF-type
#25_LM997411_xoxF_Methylacidiphilum_fumariolicum_SolV_XoxF2-type
#26_CP000975_xoxF_Methylacidiphilum_infernorum_V4_XoxF2-type
#28_JQNX01000005_xoxF_Methylacidiphilum_kamchatkense_Kam1_XoxF2-type
#15_xoxF_3_Methylocella_sp._KOX_XoxF3-type
#16_WP_012592127.1_Methylocella_silvestris_xoxFJG_XoxF1-type
#35_RUP10869.1_Hyphomicrobium_sp._XoxF1-type
#36_WP_020084048.1_Hyphomicrobium_zavarzinii_XoxF1-type
#27_Methylacidimicrobium_thermophilum_AP8_(MTHMO_v1_1700)_XoxF1-type
#21_Methylacidimicrobium_cyclopophantes_3B_Xanthomonas_type_XoxF1-type
#22_NZ_JAFS01000001.1:Methylacidimicrobium_Strain_LP2A_XoxF1-type
#23_Methylacidimicrobium_fagopyrum_3C_NZ_KB901876_XoxF1-type
#24_Methylacidimicrobium_tartarophylax_4ac_XoxF1-type
#45_YP_001203590.1_Bradyrhizobium_sp._ORS_278_ADH-type_1
#46_YP_007512722.1_Bradyrhizobium_oligotrophicum_S58_ADH-type_1
#43_YP_003067544.1_Methylobacterium_extorquens_DM4_ADH-type_2b
#44_YP_007915167.1_Hyphomicrobium_denitrificans_1NES1_ADH-type_2b
```

The order on the first pages is identical to the identifier in the alignment however with full accession number and identity.

At the right site of the alignment the different types of PQQ-methanol dehydrogenases is indicated.

This alignment combines the five clades of XoxF enzymes, the MxaF-type methanol dehydrogenases and alcohol dehydrogenases. In **red** the aspartate (D) residues that seems to be typical for the XoxF1-type. In **yellow** the cysteine (C) that is present to make space for the aspartate residue in XoxF1, although this cysteine residue also found in some XoxF5 MDHs.

In **green** the specific aspartate (D) identified to coordinate the lanthanide in the active site. The calcium-binding MxaF-type MDHs have an alanine (A) at this position.

In **grey** the typical CC (PQQ binding) which is as CY in the *Methylacidimicrobium* XoxF2-type sequences.

|            |            |               |             |             |            |             |            |            |            |            |            |       |
|------------|------------|---------------|-------------|-------------|------------|-------------|------------|------------|------------|------------|------------|-------|
| 1_ACS42169 | -----      | -N-DKLVLELS   | KSDDNWVMPG  | KNYDSNDFSD  | LKQINKGNVK | QLRPAWTFST  | G--LLNGHEG | APLVV----- | DGKMYIHTSF | -P-----NNT | FALGLDD--P | ---   |
| 2_WP_01258 | -----      | -N-DKLNQLS    | QSDDNWVMPG  | KDYKSDNFSK  | LTQINASNK  | QLKPAWSFST  | G--VLNGHEG | APLVV----- | DGKMFISSPF | -P-----NTT | FALDLDE--P | ---   |
| 3_xoxF_2_M | -----      | -N-DKLDQLS    | QSDENWVMPG  | KNYHSDNFSK  | LTQINADNVK | DLKAAWSFST  | G--VLNGHEG | APLVI----- | DGTMYVHTSF | -P-----NIT | YALDLDN--P | MxaF  |
| 39_Hyphomi | -----      | -N-DKLIELS    | KSNENWVMPG  | KNYDSNNYSE  | STQVNAENVK | QLKHAWSFST  | G--ELHGHEG | APLVI----- | GDMMYVHSSF | -P-----NKT | FALNLND--P | ---   |
| 4_WP_03626 | -----      | -N-DGLIALS    | KDPKQWALPT  | GDYANRRYSE  | LSQITSENVK | TLVPVWSFST  | G--VLRGHEG | APLVI----- | GNVMYLSTPF | -P-----NIV | YALDLNN--D | ---   |
| 5_WP_09168 | -----      | -N-DELAQAS    | KDPKQWVLP   | GDYANRRYSE  | LSQINSSNVK | NLVPAWSFST  | G--VLRGHEG | GPLVV----- | GNVMYFSTPF | -P-----NIV | YALDLNN--D | ---   |
| 6_WP_02660 | -----      | -N-DELIALS    | KDAKQWALPT  | GDYANRRYSE  | LDQINSDNVK | NLVPVWSFST  | G--VLRGHEG | GPLVI----- | GDVMYFNTPF | -P-----NII | YALDLNH--D | ---   |
| 7_WP_01259 | -----      | -N-EELITLQ    | KNAKNWALPT  | GDYSNHRFSE  | LNQITNKNVK | DLVPVWTFST  | G--VLRGHEG | NPLVI----- | GDVMYFSTPF | -P-----NIV | YALDLNN--D | ---   |
| 8_ACS40517 | -----      | -N-EDVLKRT    | QDPNQVQLQT  | LDYANTRYSK  | LDQINASNK  | NLQVAWTFST  | G--VLRGHEG | SPLVV----- | GDIMYVHTPF | -P-----NIV | YALDLNN--D | ---   |
| 9_WP_00359 | -----      | -N-ESVLKGV    | ANPAEQVLQT  | VDYANTRYSK  | LDQINASNK  | NLQVAWTFST  | G--VLRGHEG | SPLVV----- | GNIMYVHTPF | -P-----NIV | YALDLDQ--G | ---   |
| 10_WP_0117 | -----      | -N-DSVLAEI    | AKPQQWAIQM  | GDYANTRYST  | LDQINKDNVK | DLRVAVTFST  | G--VLRGHEG | SPLVI----- | GDVMYVHTPF | -P-----NRV | FALDLND--N | ---   |
| 11_xoxF_4_ | -----      | -----EAAA     | PDLANLRYSP  | LKEITTENVS  | RLTVPWTFST | G--VLRGHEG  | APLVV----- | GGVIYVHTPF | -P-----NIV | YALDLDH--D | ---        | XoxF5 |
| 12_WP_0413 | -----      | -----GSAANAD  | SDYANLRYSS  | LSEINVDIVQ  | NLAPVWTFST | G--VLRGHEG  | APLVA----- | GGALYLVTPF | -P-----NRV | MALDIAH--E | ---        | ---   |
| 34_WP_0928 | -----      | -N-RDVIAHS    | NDPDAWAVQS  | GDYSGQRYSK  | LAEINKDNVG | DLKVAWTFST  | G--VLRGHEG | GPLVI----- | GDTMYLVTPF | -P-----NAV | MALDLAH--D | ---   |
| 33_WP_0132 | -----      | -N-ESAIKAA    | SDPNNWAIQS  | QDYAGTRYST  | LHQITFENVG | DLKVAWTFST  | G--VLRGHEG | GPLVI----- | GDTMWLHSAF | -P-----NIV | FALNLAD--E | ---   |
| 38_WP_0920 | -----      | -----VASA     | QEPP--VLQT  | LDYANTRYSE  | LAQIDAGNVS | RLKVAWTFST  | G--VLRGHEG | APIVV----- | GSRMFVHTPF | -P-----NLV | YALDLDH--D | ---   |
| 37_WP_0918 | -----      | -----VASA     | KEPP--VLQT  | LDYANTRYSD  | LAQIDAGNVS | RLKVAWTFST  | G--VLRGHEG | APIVV----- | GSRMFVHTPF | -P-----NLV | YALDLDH--D | ---   |
| 17a_AAU904 | -----      | -N-AEVEALT    | KDPKNFATWG  | GNVYAGTRYST | LDQINFKNK  | HLQPVWTFST  | G--MLRGHEG | GPLVV----- | NDVIYIHTGY | -P-----HKV | YALDQA---T | ---   |
| 13_D14_FHG | -----      | -N-SGVESLT    | KNPANWATAL  | GDYAGTRYSK  | LDQINTKNVK | NLQPAWSFST  | G--VLRGHEG | GPLVV----- | DDIYIHTPF  | -P-----NTV | YALDQA---T | ---   |
| 14_E33_NFP | -----      | -N-SGVESLT    | KNPANWATAL  | GDYAGTRYSK  | LDQINTKNVK | NLQPAWSFST  | G--VLRGHEG | GPLVV----- | DDIYIHTPF  | -P-----NTV | YALDQA---T | ---   |
| 42_YP_0040 | -----      | -A-TELENLM    | KDDNQWAHPR  | KDYANTGYSR  | LSQINKGNVK | NLKMAWSFAT  | G--VNRGHEG | APLVI----- | NDVMYVHTAF | -P-----NNV | YALDLND--N | ---   |
| 40_YP_0036 | -----      | -S-DDLQKHL    | SDNKQWTHPR  | KDYANTGYSG  | LHQIQAKNIN | KLKLAWTFST  | G--VNRGHEG | SPIVL----- | GSTMVLTAF  | -P-----NNI | YALDLNN--N | XoxF4 |
| 41_YP_5464 | -----      | -A-ADQEAAM    | KDPNNVWVHPR | GQHNNQGYST  | LNQINKSNVK | NVKAQWQFAT  | G--VNRGHEG | SPVVI----- | GNNMYVHTAF | -P-----NNV | YALDLND--N | ---   |
| 17_WP_0122 | QGATVSGRSE | HPKPPSSAAP    | RDDGQWMPA   | KNFASTRYSD  | LAEITPDSVK | NLRVNFVTSV  | G--VNRGQES | SPLVI----- | DGTMFVLSPY | -P-----NIL | YALDLTK--P | ---   |
| 18_WP_0125 | -----      | -QTPPPFVKA    | DAAKEWMPA   | KDVASTRYSS  | LDQINAGNAR | DLKVAFSFSL  | G--TDRGAEA | APLVV----- | GDTMYVVTPY | -P-----NTL | FALDLKQ--S | XoxF3 |
| 19_xoxF_1_ | -----      | -QSPPSFAKA    | DQDQWMPA    | KDVASTRYSS  | LDQINAQNVK | DLKVAFTFST  | G--TDRGVES | APLVV----- | GDTMYIVAPY | -P-----NTL | FALDLKN--D | ---   |
| 29_Methyla | -----      | -N-EELLRLG    | ADPGQWMPQA  | KNYEATRYSE  | LDQISSRTVE | KLHVVSFST   | G--ALRGHEG | GPLVI----- | DNTMYVHSPF | -P-----NTV | YALDLRQ-KP | ---   |
| 31_Methyla | -----      | -N-EELLRLG    | ADPGQWMPQA  | KNYEATRYSE  | LDQISARTVE | RMHVVSFST   | G--ALRGHEG | GPLVI----- | GSTMVHSPF  | -P-----NTI | YALDLRQ-KP | ---   |
| 30_Methyla | -----      | -N-EELLRLG    | SDPGQWMPQA  | KNYAATRYSE  | LDQINTRTVE | RLHVAWSFST  | G--ALRGHEG | GPLVV----- | GSTMVHSPF  | -P-----NTV | YALDLAQ-KP | ---   |
| 32_NZ_JAFS | -----      | -N-EELLRLG    | ADPGQWMPQA  | KNYAATRYSE  | LDQINARTVE | RLRVAVSFST  | G--ALRGHEG | GPLVV----- | GGIMYVHSPF | -P-----NTV | YALDLAK-KP | ---   |
| 20_Methyla | -----      | -N-EELVRLG    | ADPGQWMPAG  | KNYAATRYSE  | LDQINTRTVE | RLHVAWSFCT  | G--ALRGHEG | GPLVV----- | GSTMVHSPF  | -P-----NTV | YALDLAR-KP | ---   |
| WP_1343907 | -----      | -N-DELIKLE    | KEPGQWVMQN  | KNYANTRYSE  | LNQINTKNVS | RLRLAWSFST  | G--ALRGHEG | GPLVV----- | GTTMYVHSAY | -P-----NHV | YALDLTQ-KP | XoxF2 |
| TFE68643.1 | -----      | -N-DELVKLE    | KDPAQWVMQN  | KNYANTRFSE  | LTQINTKNVS | RLRLAWSFST  | G--ALRGHEG | GPLVV----- | GSTMVHSAY  | -P-----NHV | YALDLTQ-KP | ---   |
| WP_1344401 | -----      | -N-DELVKLE    | KDPAQWVMQN  | KNYANTRFSE  | LTQINTKNVS | RLRLAWSFST  | G--ALRGHEG | GPLVV----- | GSTMVHSAY  | -P-----NHV | YALDLTQ-KP | ---   |
| MPANT_v1_1 | -----      | -N-EELIRLS    | KNPGDWMPR   | KNYSATAYSE  | LNQINTRNVG | KLTQVWSFAT  | G--ALRGHEG | SPLKI----- | GDTLYVHSAF | -P-----NHV | YALDLTK-KP | ---   |
| 25_LM99741 | -----      | -N-DELIKLE    | KEPGQWVMQN  | KNYANTRYSE  | LNQINTKNVS | RLRLAWSFST  | G--ALRGHEG | GPLVV----- | GTTMYVHSAY | -P-----NHV | YALDLTQ-KP | ---   |
| 26_CP00097 | -----      | -N-DELIKLE    | KDPAQWVMQN  | KNYANTRFSE  | LTQINTKNVS | RLRLAWSFST  | G--ALRGHEG | GPLVV----- | GSTMVHSAY  | -P-----NHV | YALDLTQ-KP | ---   |
| 28_JQNX010 | -----      | -N-DELIKLE    | KEPGQWVMQN  | KNYANTRYSE  | LNQINTKNVS | HLRLAWSFST  | G--ALRGHEG | GPLVV----- | GTTMYVHSAY | -P-----NHV | YALDLTQ-KP | ---   |
| 15_xoxF_3_ | -----      | GSDEEIVRNS    | KNPDLWPGMG  | QNLALQRHSD  | LKDLNKDNIG | NLQLAWSQST  | G--ALRGHEG | QPVVV-DVDG | KPMMFFVSAW | -P-----NIV | QALDLSNPDN | ---   |
| 16_WP_0125 | -----      | GSDEEIIKNS    | KNPDLWPGMG  | QNLGLQRHSE  | LKDINKDNVS | NLQMSWSQSS  | G--ALRGHEG | QPVVV-DVGG | KPMMFFVSAW | -P-----NIV | QALDLSDPDN | ---   |
| 35_RUP1086 | -----      | -E-DEVAHRA    | ANPNEWAAPG  | RDNALTRHSP  | LKDINTDNVS | KLQMVWSQST  | G--ALRGHEG | QPVVIEDVGG | KPMMFFVSGC | -PEMSKCNIV | QGLDLSDPDN | ---   |
| 36_WP_0200 | -----      | -N-DEVDKRA    | ADPNWAAAPG  | RDNHLTRHSP  | LKDINTDNVG | KLQMVWSQST  | G--ALRGHEG | QPLFIEDVGG | KPMLFFVSGC | -PNMAQCNI  | QGLDLSDPDN | ---   |
| 27_Methyla | -----      | -N-DDVLKLT    | ENPKNWAAAPG | KDYANTRHSP  | LKQINTQNVK | SLHMAWSFST  | G--VLRGHEG | QPLVI----- | GDRMYVTPY  | -P-----NIV | WALDISKGN  | XoxF1 |
| 21_Methyla | -----      | -N-DDVLKLT    | ENPKNWAAAPG | KDYANTRHST  | LKQINTQNVK | SLHMAWSFST  | G--TLRGHEG | QPLVI----- | GDRMYVSSY  | -P-----NIV | WALDLSK-GA | ---   |
| 22_NZ_JAFS | -----      | -N-DDVLKLT    | ENPKNWAAAPG | KDYANTRHSS  | LKQINTQNVK | SLHMAWSFST  | G--TLRGHEG | QPLVV----- | GDRMYVSSY  | -P-----NIV | WALDLSKGG  | ---   |
| 23_Methyla | -----      | -N-EEVLKLT    | ENPKNWAAAPG | KDYGNTRHSS  | LKQINTQNVK | SLHMAWSFST  | G--TLRGHEG | QPLVI----- | GDRMYVSSY  | -P-----NIV | WALDLSKGG  | ---   |
| 24_Methyla | -----      | -N-DDVLKLT    | ENPKNWAAAPG | KDYANTRHSS  | LKQINTQNAK | SLHMAWSFST  | G--TLRGHEG | QPLVV----- | GDRMYVSSY  | -P-----NIV | WALDLSKGG  | ---   |
| 45_YP_0012 | -----      | -N-DSAMKAA    | AEPGAWAMAG  | HDYGNTRFSP  | LKEISTENAG | KLKSLVYSFSL | A--SLRSNEA | SPIVI----- | GNTLYVSTSW | GP-----KYV | YALDAA---T | ---   |
| 46_YP_0075 | -----      | -N-ESARKAA    | SEPGAWAMAG  | HDYGNTRFSP  | LKEISTENAG | KLKSLVYSFSL | A--SLRSNEA | SPIVI----- | GNTLYVSTSW | GP-----KYV | YALDAA---T | ADH's |
| 43_YP_0030 | -----      | -E-VTEQDILNDA | KTTDDVVTYG  | LGPQAQRFSP  | IKTLNRDNK  | GLVPAWSFST  | GGEKQRGQES | QALVK----- | DGVLYVTGSY | -----SRL   | YAVDAR---T | ---   |
| 44_YP_0079 | -----      | -D-VSIDDILNDA | KTTQDVVTAG  | LGGQGRYSP   | LNEINKDNAA | SLVPAWAMSL  | GGEKMRGQES | QALVK----- | DGIMYVTSY  | -----SRV   | WAIDTK---T | ---   |

\*

\*

|            |            |            |            |            |            |            |            |             |            |            |            |            |            |       |
|------------|------------|------------|------------|------------|------------|------------|------------|-------------|------------|------------|------------|------------|------------|-------|
| GTIL-WQDKP | K----      | QNPAA      | -RAVACCDLV | NRGLAYWPGD | GKTPALILKT | QLDGNVAALN | AETGETVWKV | ENSDIKVGST  | LTIAPYVVKD | K-----     | VIIG       | SSGAELGVRG | ---        |       |
| GVIL-WEDKP | K----      | QNPAA      | -RAVACCDV  | NRGLAYWPGD | GKTPSLILKT | QLDGHVVALN | AATGEVYWKV | ENSDIKVGST  | LTIAPYVVKD | I-----     | VLVG       | SSGAELGVRG |            |       |
| TRIL-WQDKP | K----      | QNPAA      | -RSVACCDLV | NRGLAYWPGD | SKTPPLILKT | LLDGHIEALN | AKTGELVWKM | ENSDIKVGST  | LTVAPYVVKD | N-----     | VLVG       | SSGAELGVRG | MxaF       |       |
| GHIL-WQHSP | K----      | QDPAA      | -RSVACCDLV | NRGLAYWPGD | DKTPALVIKT | QLDGHVVALN | AKTGEFVWKV | ENGDIKVGST  | LTQAPYVVKD | L-----     | AIVG       | SSGAELGVRG |            |       |
| GKIL-WKYEP | K----      | QDPNV      | -IPVMCCDTV | TRGVAY--AD | GK----     | IFLY       | QADTTLVALN | AATGAHIWST  | KNGDPAKGET | GTSAPQVVKD | K-----     | VLVG       | ISGGFEGVRG |       |
| GKIL-WKYEP | K----      | QDPNV      | -IPVMCCDTV | TRGVAY--GD | GK----     | IFLY       | QADATLVALD | AHTGAHIWSA  | KNGDPSKGET | GTSAPQVVKD | K-----     | VLVG       | ISGGFEGVRG |       |
| GKIL-WKYEP | K----      | QDPNV      | -IPVMCCDTV | NRGVAY--AD | GK----     | IIQY       | QADTTLVAVD | AKTGAVVWSV  | KNGDPAKGET | GTSAPQVIKN | K-----     | VLVG       | ISGGFEGVRG |       |
| GKIL-WKYEP | K----      | QDPSV      | -IPVMCCDTV | TRGVAY--GD | GK----     | ILLG       | QADTTLVALD | AKTGPVWSV   | KNGDPAKGET | NTSAPQVIKD | N-----     | VIIG       | ISGGFEGVRG |       |
| SKIL-WKYEP | K----      | QDPSV      | -IPVMCCDTV | NRGLAY--AD | GA----     | IILH       | QADTTLVSLD | AKTGKVNWSV  | KNGDSKVGET | NTATVLPVKD | K-----     | IIVG       | ISGAEYGRG  |       |
| AKIV-WKYEP | K----      | QDPSV      | -IPVMCCDTV | NRGLAY--AD | GA----     | ILLH       | QADTTLVSLD | AKSGKVNWSV  | KNGDPSKGET | NTATVLPVKD | K-----     | VIVG       | ISGGFEGVQC |       |
| GKIL-WRYEP | Q----      | QDPNV      | -IAVMCCDTV | YRGLSY--AD | GM----     | ILLG       | QADTTVVALD | ATSGEVWKST  | KIGDPGIGET | LTATVVPVKD | K-----     | VLVG       | ISGGFEGVRG |       |
| GKIL-WKYEP | R----      | QDAGV      | -VPLMCCDTI | SRGLAY--GD | GK----     | IFLY       | QADTTLVALD | AKTGAPVWSV  | KNGDPAKGAT | GTSAPALIKD | K-----     | VLVG       | VSGGFEFGRG | XoxF5 |
| GKIL-WQYEP | R----      | QDAGV      | -VAVMCCDVV | SRGLAY--GF | GK----     | IFLY       | QADATLVALD | AVTGKPAWSV  | KNGDPAKAT  | GTSAPIVVKD | K-----     | VLVG       | VAGGFEFLRG |       |
| QKIL-WKYQP | K----      | QDPSV      | -IGVMCCDSV | NRGVQY--AE | GK----     | ILVH       | TADTSLIALD | AKTGMELWVK  | TDDDPKKGAT | GTGAPLIVKD | K-----     | VIVG       | VSGGFEFVRC |       |
| QKII-WKYEP | K----      | QDPSV      | -IPVMCCDTV | NRGLAY--AD | GK----     | IFLH       | QADTTLVALD | AKTGKELWVD  | KVNDPKKGET | GTQAPMVVKD | K-----     | VVIG       | ISGAEFVRC  |       |
| GKIL-WRYAP | R----      | QDASV      | -IAVMCCDTV | SRGLAY--AE | GR----     | LFLQ       | LADTTVVALD | PETGRVLWSV  | KNGDPARGET | NTATVLPVHG | K-----     | LIVG       | IAGGEYGARC |       |
| GKIL-WRYAP | R----      | QDAGV      | -IAVMCCDTV | SRGLAY--AD | GR----     | LFLQ       | LADTTVVALD | PETGRVLWSA  | RNGDPAKGET | NTATVLPVHG | K-----     | LIVG       | IAGGEYGARC |       |
| QSVI-WEYVY | APDKGTDQSQ | VISVMCCDVV | NRGLAY--GD | GK----     | IFLA       | QGDATLVALD | AKTGKIVWKV | KNGDPKTGMT  | ATNAPLVVKD | K-----     | VLTG       | ISGGFEGVRG |            |       |
| QSVI-WEYTP | T----      | MDADV      | TIPVMCCDTV | NRGLAY--GD | GK----     | IFLQ       | QSDTVLTALD | AKTGKRVWSV  | QNGDPKLGMT | NTQAPLVVKD | K-----     | VITG       | ISGGFEGVRG |       |
| QSVI-WEYTP | T----      | MDADV      | TIPVMCCDTV | NRGLAY--GD | GK----     | IFLQ       | QSDTVLTALD | AKTGKRVWSV  | QNGDPKLGMT | NTQAPLVVKD | K-----     | VITG       | ISGGFEGVRG |       |
| QKII-WSYFP | K----      | QDPSV      | -QALLCCDNV | NRGLGY--GD | GK----     | IFLQ       | QNDGTLVALD | AKNGNKLWVD  | KVVDTKTGAS | NTNAPHVIKD | K-----     | VITG       | CSGGEYVRC  |       |
| QKIL-WSYFP | K----      | QNPQT      | -QALLCCDNV | NRGLGY--GD | GK----     | IFLQ       | QNDGTLVALD | AKTGKLIWQT  | KVNDIKTGAS | NTNAPHVMKD | K-----     | VITG       | CSGGEYVRC  | XoxF4 |
| QKIV-WAYFP | K----      | QDPSV      | -QAVLCCDNV | SRGLGY--GD | GK----     | IFLQ       | QNDGVLVALD | AKTGAKVWVD  | KVNDPKVGAT | NTNAPHVIKD | K-----     | VLTG       | CSGAEFVRC  |       |
| GAPLKWQYNP | K----      | PEAAA      | -QGVACCDV  | NRGPTF--AD | GH----     | IFFN       | TLDGNVVSVD | AATGQEAWKT  | KVGNIHVGET | MTMAPLVARG | K-----     | VFVG       | NSGGFEGVRG |       |
| GALK-WRYDP | L----      | PSAAS      | -QGEACCDV  | NRGAVF--AD | GK----     | LIYN       | TLDDYTIADV | AASGKEVWRT  | KMGDINMGET | MTMAPLLMKD | K-----     | VLVG       | DSGGEMGVRG | XoxF3 |
| GALK-WRYDP | K----      | PSRAS      | -QGVACCDV  | NRGAVF--AD | GK----     | LIYN       | TLDDYTVAVA | ADTQGEVWRT  | KMGEINKGET | MTMAPLLARD | K-----     | VLVG       | DSGGEMGVRG |       |
| YTIL-WRYTP | E----      | QKPSA      | -VTAACYDTV | SRGVAY--GM | GK----     | IFLG       | TLDGQLIALD | AHTGDEVWVKV | KQGEISRGET | ITGAPIVIKD | M-----     | VIIG       | ISGGFEGVRG |       |
| YTIL-WKYTP | E----      | QKPSA      | -IAAACYDTV | SRGVAY--GM | GK----     | IFLG       | TLDGQLIALD | AHTGNEVWVKV | KQGEIARGET | ITGAPIVIKD | M-----     | VIIG       | ISGGFEGVRG |       |
| YSIL-WKYTP | A----      | QKASA      | -VTEACYDTV | SRGVAY--GM | GK----     | IFLG       | TLDGQLIALD | ARTGAEVWVKV | KQGEIARGET | ITGAPMVIKD | M-----     | VLVG       | ISGGFEGVRG |       |
| YAIL-WKYTP | E----      | QKPTA      | -VTEACYDTV | NRGVAY--GM | GK----     | IFLG       | ALDGEIADL  | AHTGAEVWKA  | KQGEIGRGET | ITGAPIVIKD | M-----     | VLVG       | ISGGFEGVRG |       |
| YAIL-WKYTP | A----      | QKPGA      | -ITEACYDTV | NRGVAY--GM | GK----     | IFLG       | TLDGQLIALD | AHTGDEIWKV  | KQGEIGRGET | ITGAPIVIKD | M-----     | VLVG       | ISGGFEGVRG |       |
| YAIK-WQYTP | V----      | QNSQA      | -VAVACCDV  | NRGLAY--AN | GK----     | IFMV       | TLDGQIIALD | ANTGKELWKT  | KHADVTKGET | LTGAPLVVKD | K-----     | ILVG       | VSGGFEFVRG | XoxF2 |
| YAIK-WQYTP | V----      | QNSQA      | -VAVACCDV  | NRGLAY--AN | GK----     | LFLA       | TLDGQIIALD | ANTGKELWKT  | KHADVTKGET | ITGAPLVVKD | K-----     | VLVG       | VSGGFEFVRG |       |
| YAIK-WQYTP | V----      | QNSQA      | -VAVACCDV  | NRGLAY--AN | GK----     | LFLA       | TLDGQIIALD | ANTGKELWKT  | KHADVTKGET | ITGAPLVVKD | K-----     | VLVG       | VSGGFEFVRG |       |
| YAIK-WQYTP | V----      | QNSQA      | -VAVACCDV  | NRGLAY--AN | GK----     | IFMT       | TLDGQIIALD | ANTGKELWKM  | KHADVTKGET | ITGAPLVVKD | K-----     | VLVG       | VSGGFEFVRG |       |
| YAIK-WQYTP | V----      | QNSQA      | -VAVACCDV  | NRGLAY--AN | GK----     | LFLA       | TLDGQIIALD | ANTGKELWKA  | KHADVTKGET | ITGAPLVVKD | K-----     | VLVG       | VSGGFEFVRG |       |
| YAIK-WQYTP | V----      | QNSQA      | -VAVACCDV  | NRGLAY--AN | GK----     | IFMV       | TLDGQVIALD | ANTGKELWKA  | KHADVTKGET | ITGAPLVVKD | K-----     | VLVG       | VSGGFEFVRG |       |
| PVQV-WSYNK | GTD--      | RDLSA      | -VPRACCDV  | NRGVNY--AD | GK----     | VFFN       | TLDGFLIALD | AKTGKEVWV   | KHAFPEHGET | VTNAPLIAKD | K-----     | VIVG       | FGGDEFAARG |       |
| PVQV-WSYNK | GTD--      | RDVSA      | -VPRACCDV  | NRGVNY--AD | GK----     | LLFN       | TLDGFLIALD | AKTGQELWV   | KHAFPEHGET | VTNAPLIAKD | K-----     | VIVG       | FGGDEFAARG |       |
| PKQI-WNYVK | QTD--      | RDETA      | -VPRACCDV  | NRGPAY--GD | GK----     | VVFG       | TLDGFLIALD | AQTGKEAVV   | KHAWPEKGET | ITNAPLIADG | L-----     | VIIG       | FGGDEFAARG |       |
| PKQI-WNYVK | TTD--      | RDESA      | -VPRACCDV  | NRGPAF--AD | GK----     | LYYG       | TLDGFLIALD | AATGKEVWV   | KHAWPEKGET | STSAPLIADN | V-----     | VILG       | FGGDEFAARG |       |
| YEVL-WKYAP | R----      | QDDKA      | -VSTACCDTV | NRGASY--AD | GK----     | IVFN       | TLDGYVCLD  | ANTGKELWKT  | KFADVNKGET | STPAPIIVKD | K-----     | VVTG       | YGGDEFGARG | XoxF1 |
| YEVL-WKYVP | R----      | QDDKA      | -VSTACCDTV | NRGASY--AD | GK----     | IVFN       | TLDGYVCLD  | ANTGKELWKT  | KFADVNKGET | STPAPIIAKD | K-----     | VFTG       | YGGDEFGARG |       |
| YEVL-WKYVP | R----      | QDDKA      | -VSTACCDTV | NRGASY--AD | GK----     | VVFN       | TLDGYVCLD  | ANTGKELWKT  | KFADLNKGET | STPAPIIVKD | K-----     | VFTG       | YGGDEFGARG |       |
| YEVL-WKYVP | K----      | QDDKA      | -VSTACCDTV | NRGASY--AD | GK----     | VVFN       | TLDGYVCLD  | ANTGKELWKT  | KFADLDKGET | STPAPIIVRD | K-----     | VFTG       | YGGDEFGARG |       |
| YEVL-WKYVP | R----      | QDDKA      | -VSTACCDTV | NRGASY--AD | GK----     | VVFN       | TLDGYVCLD  | ANTGKELWKT  | KFAEVNKGET | STPAPIIAKD | K-----     | VFTG       | YGGDEFGARG |       |
| GARK-WTYEP | E----      | IPDDT      | -LQYACCDVN | SRGITY--AD | GK----     | LFVG       | RLDGKLTALD | AATGKELWTA  | KVVDYKQGSV | ITSPLLVVRD | K-----     | VITG       | FGGGEYVVRG |       |
| GARK-WTYEP | D----      | IPDDV      | -LQYACCDVN | NRGVTY--AD | GK----     | LFVG       | RLDGKLTALD | AVTGKELWTS  | KVVDYKQGSV | ITSAPLVVRD | K-----     | VITG       | FGGGEYVVRG | ADH's |
| GEKK-WEYNA | R----      | LPEGI      | ---LPCCDVV | NRGAAL--YK | DK----     | VYFG       | TLDAKLVALD | QKTGKVVWRK  | DIVDFKSGYS | YTAAPMIVKG | K-----     | IITG       | VSGGFEFVVG |       |
| GHEI-WEYDA | R----      | LPEGI      | ---LPCCDVV | NRGAAL--IG | DK----     | VIFG       | TLDAKLVALN | QKTGKVVWVK  | EIDDFKGGYS | YTAPPLIVPT | KTFGPLIITG | VSGGFEFIVG |            |       |

\*

\*\*

\*\*

\*

\* \*

\*

\*

\*

\*\*

\*\*



|            |            |            |             |            |            |             |            |            |            |            |       |
|------------|------------|------------|-------------|------------|------------|-------------|------------|------------|------------|------------|-------|
| TGNPAPWNET | MRPG-----  | -----DNK   | WTMTIFGRDA  | DTGEAKFGYQ | KTPHDEWDYA | GVNVMLSEQ   | KD---KDGKA | RKLLTHPDRN | GIVYTLDRTD | GALVSANKLD | ---   |
| TGNPAPWNET | MRPG-----  | -----DNK   | WTMTIFGRDV  | DTGKAHFGYQ | KTPHDEWDF  | GVNVMLSDQ   | KD---KDGKL | RKLLTHPDRN | GIVYTLDRTN | GDLVSANKID |       |
| TGNPSPWNET | MRPG-----  | -----DNK   | WTMTIFGRDA  | DTGLAKFGYQ | KTPHDEWDYA | GVNVMLSEQ   | KD---KDGQV | RSLLTHPDRN | GIYTLDRTN  | GDLVSANKID | MxaF  |
| SGNPAPWNET | MRPG-----  | -----DNK   | WTMTIWARD   | DTGKMKFGYQ | KTPHDEWDF  | GVNVIMLSEQ  | TD---KEGKK | RKLLTHPDRN | GIVYTLDRN  | GDLISADKLD |       |
| SGNPSTWNP  | QRP-----   | -----DNR   | WSMAIWARD   | DTGVAKWIYQ | MTPHDEWDY  | GINEMIL---  | -----VGQEA | RKVLVHFDRN | GFGYTLDRVS | GELLVAEKFD |       |
| SGNPSTWNP  | QRP-----   | -----DNR   | WSMTIWARD   | DDGKVKVWYQ | MTPHDQWDY  | GINEMIL---  | -----VNQEA | RKVLVHFDRN | GFAYTLDRVT | GEPLVAEKFD |       |
| SGNPSTWNP  | QRP-----   | -----DNR   | WSMTIWARD   | DTGVAKVWYQ | LTPHDQWDY  | SINESIL---  | -----VGQEA | RKVLVHFDRN | GFGYTLDRVT | GEPLVAEKFD |       |
| SGNPSTWNP  | QRP-----   | -----DNR   | WSMSVWARD   | DSGKVKWIYQ | MTPHDEWDY  | GINEMILTEQ  | K----IGGKE | RKLLTHFDRN | GFGYTLDRVT | GELLVAEKYD |       |
| TANPSTWNP  | QRP-----   | -----DNK   | WTMAIFARNP  | DTGQAKWIYQ | MTPHDEWDY  | GINEMILTDQ  | K----VDGKE | RPLLTHFDRN | GFAYTLDRAN | GEVLVAEKFD |       |
| SGNPSTWNP  | QRP-----   | -----DNK   | WSMTIWARNP  | DTGMAKVVYQ | MTPHDEWDF  | GINEMILTDQ  | K----FDGKD | RPLLTHFDRN | GFGYTLDRAT | GEVLVAEKFD |       |
| TGNPSTWNP  | QRP-----   | -----DNK   | WSMTIMARDA  | DTGMAKWFYQ | MTPHDEWDY  | GVNEMILTNQ  | T----VDGQE | RKLLTHFDRN | GLAYTMDRET | GELLVAEKYD |       |
| TGNPSTWNP  | QRP-----   | -----DNK   | WSMAIFARDV  | DTGVARVWYQ | MTPHDEWDY  | GVNEMILTDA  | S-----GG   | RKVLTHFDRN | GFAYVLDRAD | GDLISADKYD | XoxF5 |
| TGNPSTWNP  | QRP-----   | -----DNK   | WAMTILARNA  | DTGEAAWLYQ | MIPHDQWDY  | GVNEMILGEA  | A----IDGRA | RKTLTHFDRN | GFVYVLDRAD | GELLSADKYD |       |
| TGNPSTWNP  | QRAGPDRKPI | -----DQK   | WAMTMFARDV  | DTGIARWAYQ | MTPFDQWDY  | GINEPILADE  | E----INGFP | RKTVTHFDRN | GFAYTWRAT  | GDLVAEKFD  |       |
| TGNPSTWNP  | QRAGPDGKPI | -----DQL   | YSMTMFARDV  | DTGVAKWAYQ | MTPHDEWDY  | GINEPILADE  | D----FDGTK | RAIATHFDRN | GFGYTLDRAT | GELLVAEKYD |       |
| TGNPATWNP  | QRP-----   | -----DNR   | WTMAI IARDP | DTGLARVWYQ | MTPHDQWDY  | GVNEMILTEQ  | V----IDGRP | RRVLTHFDRN | GFGYTIDRAT | GDLLVAEKFD |       |
| TGNPATWNP  | QRP-----   | -----DNR   | WTMAI IARDP | DTGMARVWYQ | MTPHDQWDY  | GVNEMILTEQ  | V----IDGRP | RRVLTHFDRN | GFGYTLDRAT | GEVLVAEKFD |       |
| SGNPSTWNP  | QRP-----   | -----DNK   | WSMTIWARDV  | DTGEAKVWYQ | MTPHDEWDY  | GINEMMLIDQ  | EMTAKDGSKH | SKLLTHFDRN | GFGYTLDRVT | GELLVAEKFD |       |
| SGNPSTWNP  | QRP-----   | -----DNK   | WSMSLWARD   | DTGAVKVVYQ | MTPHDEWDY  | GINETVLVDQ  | K----VKGKM | RKLIVHFDRN | GFGYTLDRVT | GELMVAEKFD |       |
| SGNPSTWNP  | QRP-----   | -----DNK   | WSMSLWARD   | DTGEVWVVYQ | MTPHDEWDF  | GINETVLVDQ  | K----VKGKM | RKLIVHFDRN | GFGYTLDRVT | GELMVAEKFD |       |
| TGNPSTWNP  | VRPG-----  | -----DNK   | WSMTIFARDV  | DTGMARWYQ  | MTPHDEWDY  | GMNEIVL---  | -----WEAKG | KKLATHFDRN | GFGYTFDRTN | GTLVAEKMN  |       |
| TGNPSVWNP  | VRPG-----  | -----DNK   | WAMTIFARDL  | DTGMAKGYQ  | MTPHDEWDY  | GINEVIL---  | -----WDANN | RKLAHFDRN  | GFGYTFDRTN | GSLLVAKMH  | XoxF4 |
| TGNPSVWNP  | VRPG-----  | -----DNK   | WSMTIFARDV  | DTGIAKWYQ  | MTPHDEWDY  | GINEVIL---  | -----FDKGG | KTYAWHHDN  | GFAYTFDAHT | GSIIAAEKVH |       |
| TGNPGWNP   | QRP-----   | -----DNK   | WTSGIFARDA  | ETGQARWFYQ | WSPHDLYDW  | GINEQILLDM  | T----WKGQP | RKVLVHPDRN | GYVYILDRTT | GEVLSAKPF- |       |
| VSNPWPNS   | MRPG-----  | -----DNK   | WTSGIFARDA  | DTGQARWFYQ | YSPHDLYDY  | GVNEIILLDM  | P----WKGQP | RKVLVHPDRN | GYVYVLDVRN | GEVLSAEPF- | XoxF3 |
| VSNPWPNS   | IRPG-----  | -----DNK   | WTSGIFARDA  | DTGQARWFYQ | YSPHDLYDY  | GVNEIILLDL  | T----WKGQP | RKVLVHPDRN | GYVYVIDRNT | GEVLSAEPF- |       |
| TGNPGSWNAE | ERKGG----- | -----DNK   | WSCTLWGRRP  | TTGKARWAFQ | MTPWDSWGYD | GTNELILVLDL | P----IGNAK | RKCAVHFDKN | GFVYTLDRGT | GEVLSAVPF- |       |
| TGNPGSWNT  | VRKGG----- | -----DNK   | WSCTLWGRRP  | GTGKARWAFQ | MTPWDSWGYD | GTNELILVLDL | P----IGNAK | RKCAVHFDKN | GFAYTLDRGT | GEVLSAVPF- |       |
| SGNPGSWNP  | ERKGG----- | -----DNK   | WSCTLWGRRP  | ATGKARWAFQ | MTPWDSWGYD | GTSELILIDL  | P----IGKTM | RKCAVHFDKN | GFAYTLDRGT | GEVLLATPF- |       |
| SGNPGSWNP  | ERKGG----- | -----DNK   | WACTLWGRRP  | ATGKARWAFQ | MTPWDSWGYD | GTSELVLDL   | R----IGSTL | RKCAVHFDKN | GYAYTVDRGT | GELLSAAPF- |       |
| SGNPGSWNP  | ERKGG----- | -----DNK   | WACTLWGRRP  | ATGKARWAFQ | MTPWDSWGYD | GTSELVLDL   | R----IGEGV | RKCAVHFDKN | GFAYTLDRAT | GEVLSAAPF- |       |
| TGNPGTWNAE | QRKGG----- | -----DNK   | WSCTIFARRP  | DTGKARWAYQ | MTPWDAWDYD | GINEMILPDL  | T----VKGKK | TPCLVHFDRN | GFGYVLDRRT | GQLIEAQP-  | XoxF2 |
| TGNPGTWNAE | QRKGG----- | -----DNK   | WSCSI IARRP | DTGKARWAYQ | MTPWDSWDYD | GINEMILPDL  | T----VKGKK | TPCLVHFDRN | GFGYVLDRRT | GQLIEAQP-  |       |
| TGNPGTWNAE | QRKGG----- | -----DNK   | WSCSI IARRP | DTGKARWAYQ | MTPWDSWDYD | GINEMILPDL  | T----VKGKK | TPCLVHFDRN | GFGYVLDRRT | GQLIEAQP-  |       |
| TGNPGTWNAE | QRKGG----- | -----DNK   | WSCSI IARRP | DTGKARWAYQ | MTPWDSWDYD | GINEMILPDL  | T----VKGKK | TPCLVHFDRN | GFGYVLDRRT | GQLIEAQP-  |       |
| TGNPGTWNAE | QRKGG----- | -----DNK   | WSCSI IARRP | DTGKARWAYQ | MTPWDAWDYD | GINEMILPDL  | T----VKGKK | TPCLVHFDRN | GFAYVLDRRT | GQLIEAQP-  |       |
| TGNPGWNSPT | TRCGADTQEE | CNSG-KWDNK | WSMTIFARKV  | DTGEVVWAYQ | MTPFDQWDYD | GVNENILVDF  | PN---VDGKP | VKGLVHFDRN | GFAYVLDRTD | GNLLRANKF- |       |
| TGNPGWNSPT | TRCGADTDAE | CNSG-KWDNK | WSMTIFARKV  | DTGEVVWAYQ | MTPFDQWDYD | GVNENILVDM  | PN---VDGKP | VKALVHFDRN | GFAYVLDRTD | GNLLRAHKF- |       |
| TGNPGLWSPA | YRCAKTHEE  | CNTG-EFDNK | WSMTIFGRKV  | DTGEAVFAYQ | MTPFDQWDYD | GVNENILVDM  | N----VDGKD | RKTLVHFDRN | GFNYVLDRTD | GTLLRANKY- |       |
| TGNPGLWSPA | YRCSKTHEE  | CNTG-EFDNK | WSMTIFARKV  | DTGEAVWAYQ | MTPFDQWDYD | GVNENILVDM  | D----VDGKK | RKALVHFDRN | GFAYVLDRAD | GTLLRANKY- |       |
| TGNPGLWSPS | YRTEAKTHEE | ANEPKWWDNK | WSMTIFARKP  | DTGEAVWYQ  | MTPFDQWDYD | GINEDVLVDI  | T----VDGSK | KPCLVHFDRN | GFCYVLRNTD | GTLIRANKF- | XoxF1 |
| TGNPGLWSPS | YRTEAKTHEE | ANEPKWWDNK | WSMTIFARKP  | DTGEAVWYQ  | MTPFDQWDYD | GINEDVLVDI  | N----VDGAK | KPCLVHFDRN | GFCYVLRNTD | GTLIRANKF- |       |
| TGNPGLWSPS | YRTEAKTHEE | ANEPKWWDNK | WSMTVFARKP  | DTGEAVWYQ  | LTPFDQWDYD | AINEDVLVDI  | T----VDGAK | KPCLVHFDRN | GFAYVLSRTD | GTLIRANKF- |       |
| TGNPGLWSPS | YRTEAKTFEE | ANEPKWWDNK | WSMTVFARKP  | DTGAAVWYQ  | LTPFDEWDYD | AINEDVLVDI  | N----VDGAK | KPCLVHFDRN | GFCYVLRNTD | GTLIRANKF- |       |
| TGNPGLWSPS | YRTEAKTHEE | ANEPKWWDNK | WSMTVFARKP  | DTGEAVWYQ  | MTPFDQWDYD | GINEDVLVDI  | N----VDGAK | KPCLVHFDRN | GFCYVLDRTD | GTLIRANKF- |       |
| TGNPWPNTA  | VRSTGNGDFG | -----KLTNL | YTASTLALDP  | NTGKIKWHIQ | TTPADAWDYD | GVNEAVLADL  | N----VGGAA | VPTLMKADRN | GFFFVANRET | GKVISAKEY- |       |
| TGNPWPNTA  | VRSTGNGDFG | -----KLTNL | YTASTLAIDP  | NNGAIKWHIQ | GTPADAWDYD | GVNEALLADL  | K----IGGAS | VPTLMKADRN | GFFFVANRET | GKVISAKEY- | ADH's |
| TGNPWPNSA  | LRPG-----  | -----DNK   | WSASRLAINP  | DNGEIVWGFQ | TTPHDGWDYD | GVNEFVFPDM  | Q----KDGKT | VKAGATADRN | GFFYVLDRTN | GAFLSATPFV |       |
| TGNPAPWNSH | MRPG-----  | -----DNR   | WSCSRLAIDP  | ETGNIKWGFQ | TTPNDGWDFD | GVNEVVS---  | -----FDLDG | TKAVATADRN | GFFYVLRNEN | GKFIIRGPFV |       |

\*\* \* \*

\*

\*

\*

\*

\*

\*

\*

\*

\*



|            |            |             |              |            |            |            |             |             |             |             |       |
|------------|------------|-------------|--------------|------------|------------|------------|-------------|-------------|-------------|-------------|-------|
| DTVNVFKSVD | LKT-----GQ | PVRDPEYGTR  | M-----DHL    | AKDI--CPSA | MGYHNQGHDS | YDPKR-ELFF | MGINHICMDW  | EPFMLPYR-A  | GQFFVGGATLN | MYPG-----   | ---   |
| DTVNVFKQVD | LKS-----GT | PVRDPEFGTR  | M-----DHL    | AREV--CPSA | MGYHNQGHDS | YDANK-QLFY | MGINHICMDW  | EPFMLPYR-A  | GQFFVGGATLN | MYPG-----   | ---   |
| DTVNEFKSVD | MKT-----GQ | PIRDPEYGTR  | M-----DHL    | AKDI--CPSA | MGYHNQGHDS | YDPQK-QLFF | MGVNHICMDW  | EPFMLPYR-A  | GQFFVGGATLN | MYPG-----   | MxaF  |
| DTVNVFKHVD | LKS-----GL | PVRDPEFGTR  | M-----DHL    | GTEI--CPSA | MGYHNQGHDS | YDPTK-QLFF | MGINHICMDW  | EPFMLPYR-A  | GQFFVGGATLN | MYPG-----   | ---   |
| PAVNWATKVD | MDKNSKTYGR | PLVVPAFSTE  | HN-----GED   | VNSQGIMPAA | LGVKDQQPAA | YSPLT-GLFY | IPANHVAMDY  | EPFRVSYT-A  | GQPYIGATLS  | MYP-----    | ---   |
| PAVNWATKVD | LDKNSKTYGR | PLVVKEFSTE  | SN-----GED   | VNSQGIFPAA | LGVKDQQPAA | YSPIT-NLFY | VPANHVAMDY  | EPFRVSYT-A  | GQPFVGGATLS | MYP-----    | ---   |
| PAVNWATKVD | LDKNSKTYGR | PLVVKEFSTE  | AN-----GED   | VNTQGVMPAA | LGVKDQQPAA | YSPLT-NLFY | IPANHVAMDY  | EPFRVSYA-A  | GQPYVGGATLS | MYP-----    | ---   |
| PAVNWATKVD | MDKSSKSYGR | PLVVPQFSTA  | HG-----GED   | VNTKGCIPAA | LGSKDQPSA  | YSPLT-ELHY | VPTNHVCMYD  | EPFRVSYT-A  | GQPYVGGATLS | MYP-----    | ---   |
| PVVNWASKVD | LDKGSKNYGR | PLVVSXYSTD  | QN-----GED   | VNSKGICPAA | LGTKDQQPAA | FSPKT-QLFY | VPTNHVCMYD  | EPFKVTTYT-P | GQPYVGGATLS | MYPA-----   | ---   |
| PVVNWATKVD | LDKGSKTYGR | PLVVSXYSTE  | QN-----GED   | VNSKGICPAA | LGTKDQQPAA | FSPKT-GLFY | VPTNHVCMYD  | EPFRVTTYT-P | GQPYVGGATLS | MYPA-----   | ---   |
| PVVNWTTGVD | MDPNSETYGR | PAVVAEYSTA  | QN-----GED   | ENTTGVCPPA | LGTKDQQPAA | FSPKT-NLFY | VPTNHVCMYD  | EPFRVAYT-A  | GQPYVGGATLS | MYPA-----   | ---   |
| PAVNWASRID | MDKSSKSYGR | PIVDGAYSTQ  | QN-----GEE   | TVTHGVCPST | VGAKNANPAA | YSALT-GLFY | APMIRLCMDY  | EPFQITYA-A  | GQPYTGADTA  | VYPE-----   | XoxF5 |
| PAVNWASRVD | LGKSSKAYGR | PVLDNAYSTE  | AN-----GEE   | TVTHNICPAT | VGAKNANPAA | YSEQT-GLFY | APMIRLCMDY  | EPFHAIYA-Q  | GQPYTGADTA  | VYPQ-----   | ---   |
| PAANWATSIV | MDKNDPHYGR | PAVVKKYAPF  | ET-----GTD   | ETTKGICPSS | LGSKNQPPAS | YSLAT-GLFY | VPTTRMCMYD  | EPFKVSYT-V  | GQPYVGGATLT | MYPV-----   | ---   |
| PAVNWATGVD | MDKSSKSYGR | PIRVAKYSTF  | KDGL-----GAD | VNTKGCIPAA | LGSKDQPPAS | FSKLT-GLFY | VPTNHVCMYD  | EPFKVSYT-A  | GQPYVGGATLS | MHPA-----   | ---   |
| PSVNWARRID | LDRASPTYGR | PVVDPRFAPG  | EA-----DEE   | EVTKNICPGA | LGAKNQPPAA | YSPVT-RLFY | VPTNHVCMYD  | EAFRVSYT-P  | GQPYVGGATLT | LHP-----    | ---   |
| PSVNWARRID | LDRASPGYGR | PVLDTRYAPG  | EA-----DEE   | EVTKNICPGA | LGAKNQPPAA | YSPVT-RLFY | VPTNHVCMYD  | EAFRVSYT-P  | GQPYVGGATLT | LHP-----    | ---   |
| KAVNWATHVD | MKT-----GR | PQVNPKYSTQ  | HG-----GQD   | VDTKGCIPSA | MGAKNEPPVT | YSPRT-KLIY | IPGNHTCMNY  | EPFEVEYT-A  | GQPYVGGATLN | IFPARANVKT  | ---   |
| KSVNWATHVD | MHT-----GR | PQVVPPEMSTE | QN-----GED   | VNTVGVCPAA | LGSKNQPPVS | FSPKT-GLFY | ISGNHLCMEY  | EPFEVSYT-A  | GQPYVGGATLT | MQPAGADVMT  | ---   |
| KSVNWATHVD | MHT-----GR | PQVVPPEMSTE | QN-----GED   | VNTVGVCPAA | LGSKNQPPVS | FSPKT-GLFY | ISGNHLCMEY  | EPFEVSYT-A  | GQPYVGGATLT | MQPAGADVMT  | ---   |
| PFVNWATKVD | LKS-----GV | PVKDKPFSTH  | Q-----DYN    | A--KGICPAA | LGVKDEQPSA | FSPKT-GMFY | VLNHLVCMYD  | EPVESKYI-A  | GQPWVGADLT  | MFAG-----   | ---   |
| PFVNWATSVD | LST-----GI | PQKDKPKYSAH | Q-----DTT    | TKNV--CPAA | LGKDKQPPAA | YSPRT-KLFY | VPLNHLVCMYD | DVVEAKYT-A  | GQPWVGAGLT  | MHPG-----   | XoxF4 |
| PFVNWATHVD | KAT-----GI | PHKDGKYSTH  | Q-----DYN    | T--KGICPAA | LGTKDQQPAA | YSPRT-GLVY | SPLNHLVCMYD | EPVESKYI-A  | GQPWVGATLT  | MFAG-----   | ---   |
| HAITTTTGV  | LKT-----GR | LQYIPEKKPQ  | M-----GKV    | MRDI--CPNA | SGAKDWSPPA | YSPRT-GLIY | LPHTNLCMDE  | EHMQANYI-A  | GTPYLGSETR  | MKAG-----   | ---   |
| QKITSSTGVD | LKT-----GR | LQYVAAKQPK  | L-----GET    | VRDI--CPAP | PGAKDWQPSA | FSNKT-KLLY | LPHNNLCFDT  | EEDVGYI-A   | GTPYVGGASIH | MHAG-----   | XoxF3 |
| QAITSSTGVD | LKT-----GR | LQYVEAKRPK  | T-----GET    | VRDI--CPAP | PGAKDWQPTA | FSHKT-GLLY | IPHNNLCFDT  | EELDVGYI-E  | GTPYVGGANIH | MKAG-----   | ---   |
| VYLNWAKGIN | RGD-----DR | PIEVPEKRAK  | L-----GID    | V--KRVCPSS | MGGKNQPPAA | YDPET-HLFY | VGTTNNLCMDI | QDMEARYN-P  | GSPYVGGADLL | IYSGH-----  | ---   |
| VYENWAKGIN | RGD-----DR | PIEVPEKRAK  | L-----GVD    | V--KGVCPSS | MGGKNQPPAA | YDPET-HLFY | VGTTNNLCMDI | QAMEAKYN-P  | GTPYVGGADLL | IYSGH-----  | ---   |
| VYVNWAKGIN | RGD-----DR | PIEVPEKRTK  | A-----GIE    | V--KGVCPSS | MGGKNQPPAA | YDPQT-HLLY | VGTTNNLCMDI | EPVEARYI-P  | GSPYIGADLI  | IYSGH-----  | ---   |
| VYVNWAKGIS | RGD-----DR | PIEVPEKRAK  | A-----GVD    | I--KGVCPSS | MGGKNQPPAA | YDPET-HLFY | VGTTNNLCMDI | LATEVRYI-S  | GSPYIGADLK  | IYSGH-----  | ---   |
| VYVNWAKGIN | RGD-----DR | PIEVPEKRAK  | A-----GID    | I--KGVCPSS | MGGKNQPPAA | YAPQT-HLFY | LGTTNNLCMDI | EATEARYV-L  | GLPYIGANLT  | IYSGH-----  | ---   |
| VYVNWAKEIS | KEN-----DR | PVEIPEKRTK  | Q-----GVD    | T--KGICPNS | MGGKDQPPAA | FSPQT-GLFY | VPTNNMCMNY  | EGVEATYT-A  | GAPYVGGANVL | MYSGH-----  | XoxF2 |
| VYENWAKEIS | KEN-----DR | PVEIPEKRTK  | Q-----GVD    | T--KGICPNS | MGGKDQPPAA | FNPQT-GLFY | VPTNNMCMNY  | EGVEATYT-A  | GAPYVGGANVL | MYSGH-----  | ---   |
| VYVNWAKGID | KNT-----DR | PIEVPEKLTK  | Q-----GVD    | T--KNICPCA | MGGKDQPPSA | YSPQT-GLLY | AGTTNNMCMNY | EGVEVKYA-A  | GAPYVGGANVL | MFSGH-----  | ---   |
| VYVNWAKEIS | KEN-----DR | PVEIPEKRTK  | Q-----GVD    | --TKGICPNS | MGGKDQPPAA | FSPQT-GLFY | VPTNNMCMNY  | EGVEATYT-A  | GAPYVGGANVL | MYSGH-----  | ---   |
| VYENWAKEIS | KEN-----DR | PVEIPEKRTK  | Q-----GVD    | T--KGICPNS | MGGKDQPPAA | YNPQT-GLFY | VPTNNMCMNY  | EGVEATYT-A  | GAPYVGGANVL | MYSGH-----  | ---   |
| VYENWAKEIS | KEN-----DR | PVEIPEKRTK  | Q-----GVD    | T--KGICPNS | MGGKDQPPAA | FSPQT-GLFY | VPTNNMCMNY  | EGVEATYT-A  | GAPYVGGANVL | MYSGH-----  | ---   |
| VTVNWAEKVD | LKT-----GR | PVKVPEHSPF  | KI-----GVN   | TQA---CPSA | MGGKDQPPAS | VDPKDPTNFY | VPTNNWCMED  | EPQARTHTQQ  | GTVYVVFANVY | MYPEK-----  | ---   |
| VTVNWAEKVD | LKT-----GR | PVKVPEHSPF  | KI-----GVN   | TQA---CPSA | MGGKDQPPAS | VDPKDPTNFY | VPTNNWCMED  | EPQARTHTQQ  | GTVYVVFANVY | MYPEK-----  | ---   |
| VTVNWAEKID | LKT-----GR | PVKVREHSPL  | ER-----GRN   | VNA---CPSA | MGGKDQPPCS | VDPAEPNKFY | CPTNNWCMEL  | EPQERSHTQQ  | GTVYVVFANVY | MYPEK-----  | ---   |
| VTVDWAEKVD | LKT-----GR | PVKVREHSPL  | ER-----GRN   | VSA---CPSA | MGGKDQPPCA | VDPAEPTKFY | CPTNNWCMEL  | EPQERTHTQQ  | GTVYVVFANVY | MYPEK-----  | ---   |
| VTVNWAEKID | MKT-----GR | PVKVKEHSPF  | EV-----GKA   | VQA---YPSA | MGGKDQPPVA | VDPKEPNVYF | APTNNWGMTL  | EPMERAHTNQ  | GSVYVVFANVL | MKPEK-----  | XoxF1 |
| VTVNWAEKID | FKT-----GR | PVKVKEHSPF  | EV-----GKA   | VQA---YPSA | QGGKDQPPVA | VDPKEANVYF | APTNNWGMTL  | EPQERAHTNQ  | GSVYVVFANVL | MKAKEK----- | ---   |
| VTVNWAEKID | MKT-----GR | PVKVKEHSPF  | EV-----GKA   | VQA---YPSA | QGGKDQPPVA | VDPKEANVYF | APTNNWGMTL  | EPMERAHTNQ  | GSVYVVFANVL | MKPEK-----  | ---   |
| VTANWAEKID | MKT-----GR | PVKVKEHSPF  | EV-----GKA   | VQA---YPSA | QGGKDQPPVA | VDPKEANVYF | APTNNWGMTL  | EPMERAHTNQ  | GSVYVVFANVL | MKPEK-----  | ---   |
| VTVNWAEKID | MKT-----GR | PVKVKEHSPF  | EV-----GKA   | VQA---YPSA | QGGKDQPPVA | VDPKEANVYF | APTNNWGMTL  | EPMERAHTNQ  | GSVYVVFANVL | MKAKEK----- | ---   |
| VFANWAQKWD | TST-----LR | AVEDPDKRPG  | P-----GHP    | VKDV--CPNL | IGGKNWQPMS | YSPDT-GLVY | IPANNVCMYD  | SVGDVSYK-R  | GVFYLGAEPF  | TKEG-----   | ---   |
| VFANWAQKVD | IAT-----SR | AVEDPDKRPG  | P-----GHP    | AKDI--CPNL | IGGKNWQPMS | YSPDT-GLVY | IPANNVCMYD  | SVGDVSYK-R  | GVFYLGAEPF  | TKEG-----   | ADH's |
| SNINWAKGID | EN-----GR  | PIYDDANRPG  | DPAKSEDGKK   | GKSUYATPGF | LGGKNWNPIA | YSPDT-RLFY | IPANNVCMYD  | WNEPVNYK-K  | GAAYLGAGFT  | IKPT-----   | ---   |
| EKITWATGLD | EN-----GR  | PKFVADNRPG  | DPKDSKDGKQ   | GKSVFAVPSF | LGGKNQPPMA | YSPDT-KLFY | VPSNEWGMDI  | HNEPVTYK-K  | GAAYLGAGFT  | IKPI-----   | ---   |

\*

\*

\*



|             |             |            |            |            |         |       |
|-------------|-------------|------------|------------|------------|---------|-------|
| ADPTA-----  | GLGAVGAFKK  | LA--NYTQMG | GGVVVFSLDG | KGPYDDPNVG | EWKSAAK | ---   |
| QDPTA-----  | GLGAVGAFKK  | LA--HYTQMG | GGTMVFSLDG | KGPYDDVNLG | EFASSK- |       |
| QDPTA-----  | GLGAVGAFKQ  | LA--NYTQQG | GGVLVFSLNG | KGPYDDPNVG | EYQSAN- | MxaF  |
| QDPTA-----  | GLGAVGAFKN  | LQ--RYTQMG | GSLEVFSLDG | KNPYDDVNVG | EWTKG-- | ---   |
| TNPTA-----  | GLGAVGGYSS  | LA--NYTALG | GQLTVFALPE | Q-----     | -----   |       |
| TKGTE-----  | GLGAVGGYAS  | LA--NYTALG | GQLTVFALPN | -----      | -----   |       |
| SKGTE-----  | GLGAVGGYAS  | LA--NYTALG | GQLTVFALPG | K-----     | -----   |       |
| TDPNA-----  | GLGAVGGYAA  | LS--NYTALG | GQLTVFALHG | K-----     | -----   |       |
| TDPNA-----  | GLGAVGGYAA  | LS--QYTNLG | GQLTVFALPN | -----      | -----   |       |
| TDPNA-----  | GLGAVGGYAA  | LS--SYTNLG | GQLTVFSLPN | N-----     | -----   |       |
| TNPNND----- | GLGAVGGYAS  | LS--QYTELG | GQLTVFELPG | -----      | -----   |       |
| THSDE-----  | GANSPPGVYAA | LA--NYTALG | GQLTVFALK- | -----      | -----   | XoxF5 |
| TQTPE-----  | GANSPEVYAA  | LA--QYTALG | GQLTVFALP- | -----      | -----   |       |
| TNPPDD----- | GSGAVGGFAS  | LS--GYTSLG | GSLTVFALP- | -----      | -----   |       |
| TNPTD-----  | GLGAVGGYAG  | LK--QYTNLG | GSLTVFALP- | -----      | -----   |       |
| TDPAD-----  | GSGAVGGYAA  | LS--QYTAPG | GQLTVFALPE | -----      | -----   |       |
| TDPAD-----  | GSGAVGGYAA  | LS--QYTAPG | GQLTVFALPE | -----      | -----   |       |
| EGDTE-----  | GLGAVGAYKG  | LS--SHTKLG | GVFTVFALP- | -----      | -----   |       |
| DDGSDSTNTE  | GLGAVGAYRS  | LS--SFTKLG | GTFTVFALPG | K-----     | -----   |       |
| DDGSDSTNTE  | GLGAVGAYRS  | LS--SFTKLG | GTFTVFALPG | K-----     | -----   | ---   |
| TNETD-----  | GLGAAGGYKE  | LTKWNAAPGG | GAMNVFSL-- | -----      | -----   |       |
| TEDSD-----  | GAGAAGAYRE  | LTKWNAAPGG | GAVSAFSL-- | -----      | -----   | XoxF4 |
| ENETD-----  | ALGAAGGYKE  | LTKYNAAPGG | GALNVFSL-- | -----      | -----   | ---   |
| DPRDATG---  | ALGFLNAMRD  | LK--KVTTKG | GMLYDFVLP- | -----      | -----   |       |
| DKRDGTA---  | ALGFVNAMKD  | LP--EVTTKG | GELYVFALP- | -----      | -----   | XoxF3 |
| NKMDGTA---  | ALGFVNAMKD  | LP--DVTTKG | GMLYVFALP- | -----      | -----   | ---   |
| PKDDPRA---  | AMGANGAADD  | SGLPQSTTPG | GELVVFGLD- | -----      | -----   |       |
| PKDDPRA---  | AMGANGAADN  | SGLPQSTTPG | GELVVFGLD- | -----      | -----   |       |
| PKSDPRA---  | AMGADGAAYA  | SHLPESTTPG | GELVVFGLD- | -----      | -----   |       |
| PKGDPRA---  | AMGAAGAAYD  | SGLPESTTPG | GELVVFGLE- | -----      | -----   |       |
| PRGDRQG---  | AMGASGAAYD  | SGLPGSTTPG | GELVVFGLE- | -----      | -----   |       |
| PPDDPYA---  | GLGAVGVAYQ  | AGLPKATTIG | GELYVFSLE- | -----      | -----   | XoxF2 |
| PPDDPYA---  | GLGAVGVAYQ  | AGLPKATTIG | GELYVFSLE- | -----      | -----   |       |
| PPDDPYA---  | GLGAVGVAYQ  | AGLPKATTIG | GELYVFSLE- | -----      | -----   |       |
| PPDDPFG---  | ALGAIGAAYQ  | SGLDKATSVG | GELVVFALP- | -----      | -----   |       |
| PPDDPYA---  | GLGAVGVAYQ  | AGLPKATTVG | GELYVFALE- | -----      | -----   |       |
| PPDDPYA---  | GLGAVGVAYQ  | AGLPKATTIG | GELYVFSLE- | -----      | -----   |       |
| PPDDPYA---  | GLGAVGVAYQ  | AGLPKATTIG | GELYVFSLE- | -----      | -----   | ---   |
| DLDDKFG---  | AIGSTALTKV  | GGF-NKIPQG | GTLYTFRVPD | KAASTQ---- | -----   |       |
| DLEDKFG---  | AIGSTALTKV  | IGL-NKIPQG | GALYTFRVPD | KEATAH---- | -----   |       |
| DLNDKFG---  | AIGATAMTKA  | ANL-DKIPQA | GTLFTFRVME | -----      | -----   |       |
| DLNDKFG---  | AIGATAMTKA  | ANL-DKIPQA | GTLFTFRVFE | -----      | -----   |       |
| DPADPYG---  | ALGVSGMAAE  | NGF-YNIPMG | GTLYTFCVQ- | -----      | -----   | XoxF1 |
| DPSDPYG---  | ALGCSGMAAE  | NGF-YNIPMG | GTVYTFCVQ- | -----      | -----   |       |
| DPADPYG---  | ALGVAGMAGE  | NGF-YNIPMG | GTLYTFCVQ- | -----      | -----   |       |
| DPADPYG---  | ALGVAGMAGE  | NGF-YNVPMG | GTLYTFCVQ- | -----      | -----   |       |
| DPSDPYG---  | ALGDSGLAAD  | NGF-YNIPMG | GTLYTFCVQ- | -----      | -----   | ---   |
| -----       | -LGEIGK---  | -KMTNAAPEG | GALFVFAVQ- | -----      | -----   |       |
| -----       | -LGEIGK---  | -KMTNAAPEG | GALFVFAVQ- | -----      | -----   | ADH's |
| VAKTT-----  | -----       | ----AGINQG | GSFWAFRLPK | ALASR----- | -----   |       |
| VAKTV-----  | -----       | ----QHLNQG | GMVWTFKIPK | KTASN----- | -----   | ---   |

\* \* \*
