# Supplementary material for: Neodymium as Metal Cofactor for Biological Methanol Oxidation: Structure and Kinetics of an XoxF1-Type Methanol Dehydrogenase
Source: PubMed Central journal article supplement (PMC8546591; doi:10.1128/mbio.01708-21), 2021-09-21
Supplement: mbio.01708-21-sf004.pdf [file mbio.01708-21-sf004.pdf]

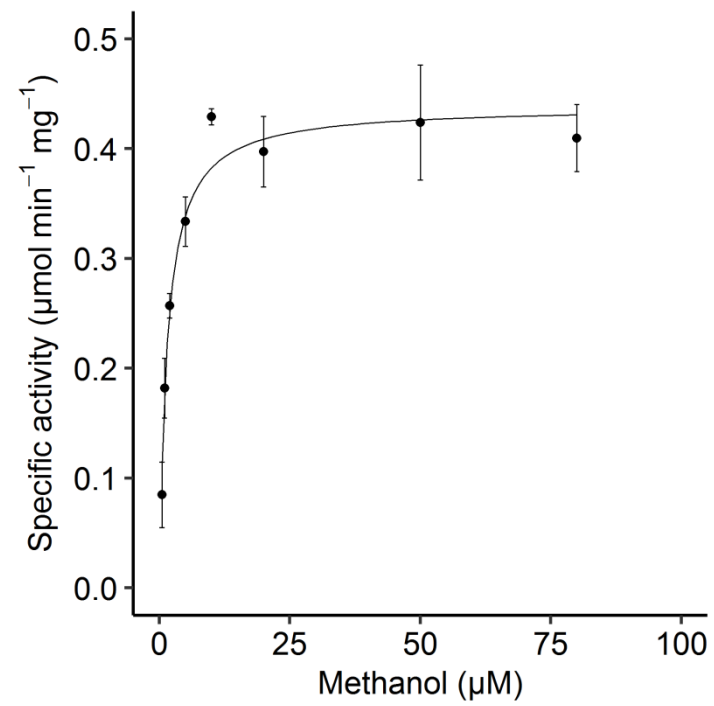

**Figure S4:** Specific enzyme activity of methanol oxidation by Nd-XoxF1 measured spectrophotometrically in a 4 mL cuvette.
