# Supplementary material for: Neodymium as Metal Cofactor for Biological Methanol Oxidation: Structure and Kinetics of an XoxF1-Type Methanol Dehydrogenase
Source: PubMed Central journal article supplement (PMC8546591; doi:10.1128/mbio.01708-21), 2021-09-21
Supplement: mbio.01708-21-st001.pdf [file mbio.01708-21-st001.pdf]

**Table S1:** Diffraction data and crystallographic model statistics. Values for the highest resolution shell are given in parentheses.

| <b>PDB 7O6Z</b>                              |                    |
|----------------------------------------------|--------------------|
| <b>Data collection</b>                       |                    |
| Space group                                  | $P2_1$             |
| Unit cell dimensions                         |                    |
| <i>a</i> , <i>b</i> , <i>c</i> [Å]           | 89.5, 70.0, 96.5   |
| $\alpha$ , $\beta$ , $\gamma$ [°]            | 90, 91.7, 90       |
| Wavelength [Å]                               | 0.99985            |
| Resolution range [Å]                         | 48.6-2.3 (2.4-2.3) |
| No. measurements                             | 103,564 (7,698)    |
| Unique reflections                           | 51,250 (3,810)     |
| Completeness [%]                             | 94.8 (96.1)        |
| Redundancy                                   | 2.0 (2.0)          |
| $I/\sigma(I)$                                | 8.4 (1.2)          |
| $R_{\text{merge}}$                           | 0.065 (0.787)      |
| $R_{\text{meas}}$                            | 0.087 (1.048)      |
| $CC_{1/2}$                                   | 99.7 (61.8)        |
| <b>Refinement</b>                            |                    |
| Resolution range in refinement [Å]           | 48.6-2.3           |
| Number of reflections in refinement          | 51,183             |
| $R_{\text{work}}/R_{\text{free}}$            | 0.1952 / 0.2529    |
| Protein residues / no. of atoms              | 1176 / 9546        |
| Ligands / no. of atoms                       | 4 / 30             |
| Overall B-factor [Å <sup>2</sup> ]           | 53.57              |
| Rmsd from ideal geometry                     |                    |
| bonds [Å]                                    | 0.005              |
| angles [°]                                   | 1.14               |
| %-age residues in areas of Ramachandran plot |                    |
| Most favored                                 | 93.43              |
| Additionally allowed                         | 6.23               |
| Outliers                                     | 0.34               |
